# Supplementary material for: Graphene as a photothermal actuator for control of lipid mesophase structure
Source: Royal Society of Chemistry journal article supplement (doi:10.1039/c6nr08185a), 2016-11-30
Supplement: c6nr08185a1.pdf [file c6nr08185a1.pdf]

Electronic Supplementary Information

Graphene as a photothermal actuator for control of lipid mesophase structure

Received 20th September 2016,  
Accepted 00th October 2016

DOI: 10.1039/x0xx00000x

www.rsc.org/

Matthew D. J. Quinn,<sup>a</sup> Tao Wang,<sup>b</sup> Joanne D. Du,<sup>c</sup> Ben J. Boyd,<sup>c</sup> Adrian Hawley,<sup>d</sup> and Shannon M. Notley\*

E-mail: shannon.notley@anu.edu.au

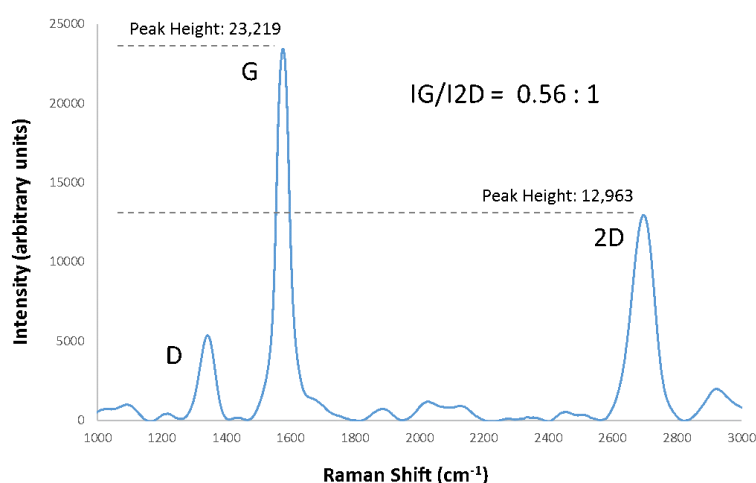

**Fig. S1** Raman spectra for exfoliated F108-graphene sample showing the peak intensity ratios between G and 2D indicating highly exfoliated graphene.

<sup>a</sup> Department of Applied Mathematics, Research School of Physics and Engineering, The Australian National University, Canberra, ACT 2601, Australia

<sup>b</sup> Department of Chemistry and Biotechnology, Faculty of Engineering, Science and Technology, Swinburne University of Technology, Hawthorn, VIC 3122, Australia

<sup>c</sup> 3Drug Delivery, Disposition and Dynamics and ARC Centre of Excellence in Convergent Bio-Nano Science and Technology, Monash Institute of Pharmaceutical Sciences, Monash University (Parkville Campus), 381 Royal Parade, Parkville, Victoria 3052, Australia

<sup>d</sup> SAXS/WAXS Beamline, Australian Synchrotron, Clayton, Victoria, Australia

† Electronic Supplementary Information (ESI) available: [Additional materials and experimental details including further graphene characterization data, blank lipid SAXS patterns, initial graphene loaded SAXS patterns, and lipid chemical structures.]. See DOI: 10.1039/x0xx00000x

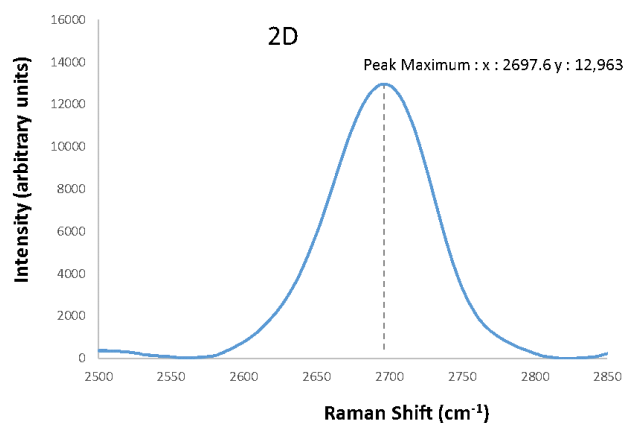

Fig. S2 F108-graphene 2D peak enlarged showing symmetry and Raman shift position.

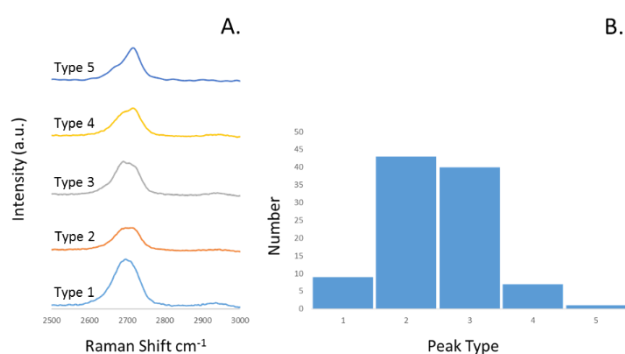

Fig. S3 (A) 2D peak change in shape with sheet thickness with (B) the sheet thickness distribution based on 2D peak shape.

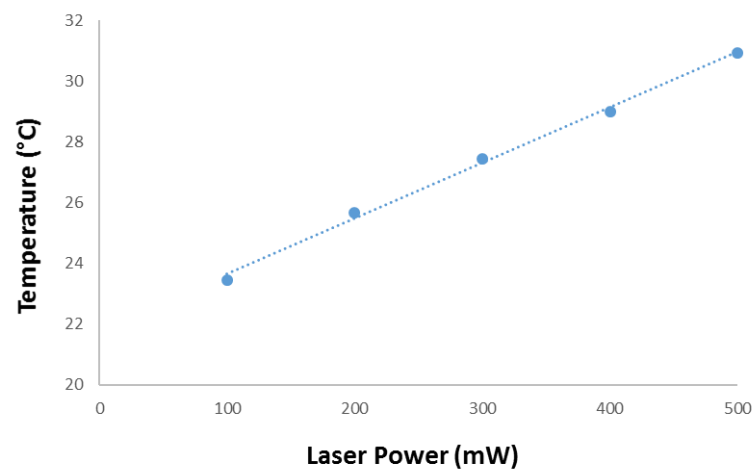

Fig. S4 Maximum bulk temperature of 0.1 mg ml<sup>-1</sup> F108-graphene suspensions as a function of 808 nm laser power. Demonstrating the linear relationship between laser power and photothermal transduction.

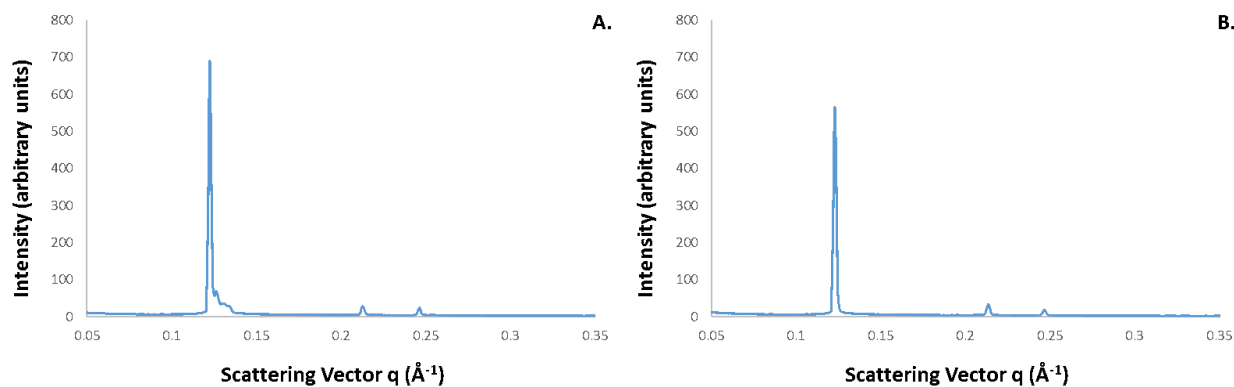

Fig. S5 Glyceryl monoether samples with (S5A) no graphene present and (S5B)  $0.5 \text{ mg ml}^{-1}$  present.

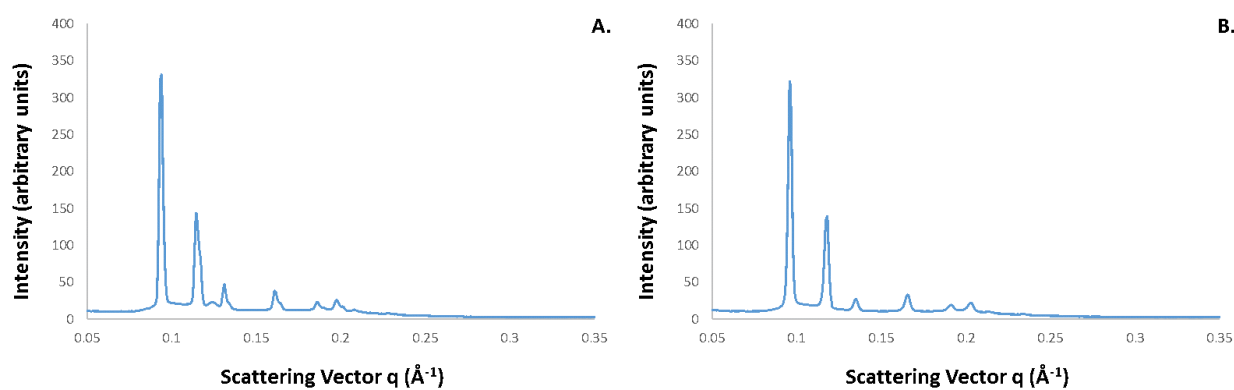

Fig. S6 Glyceryl monooleate samples with (S6A) no graphene present and (S6B)  $0.5 \text{ mg ml}^{-1}$  present.

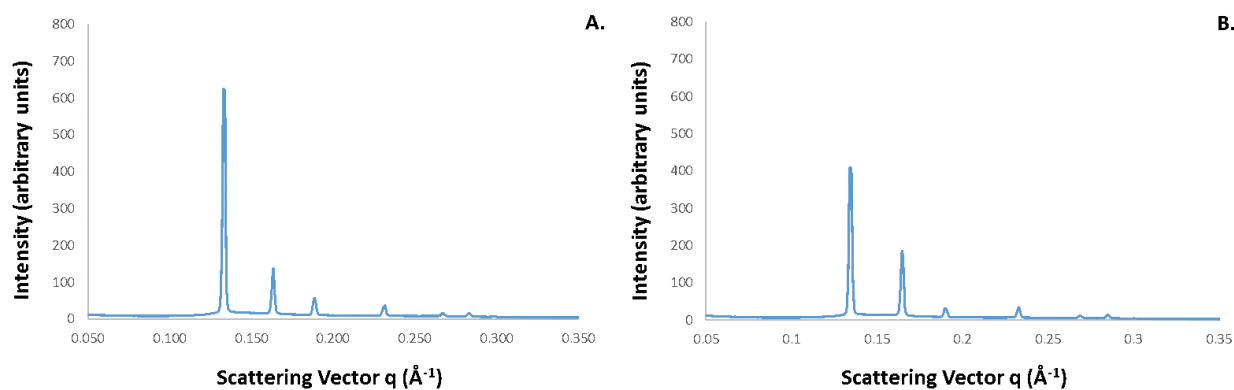

Fig. S7 Phytantriol samples with (S7A) no graphene present and (S7B)  $0.5 \text{ mg ml}^{-1}$  present.

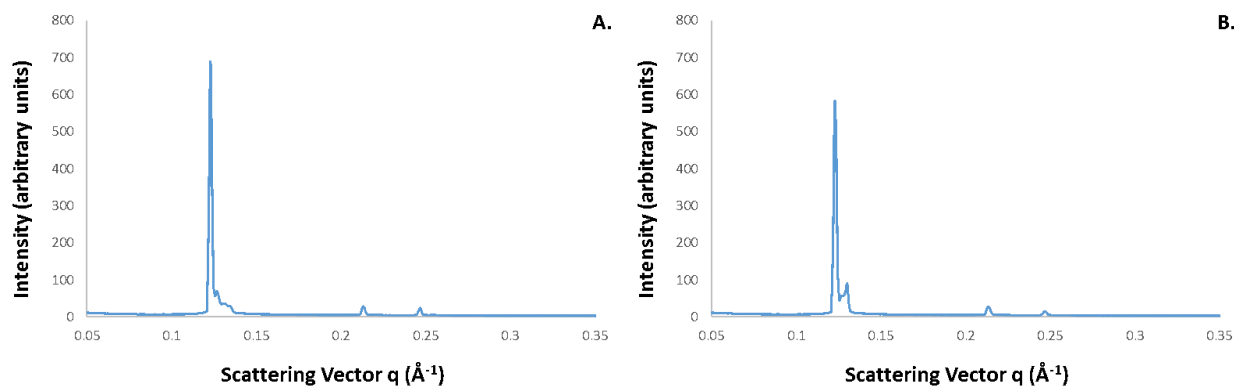

Fig. S8 Unloaded glyceryl monoether sample (S8A) prior to NIR exposure and (S8B) after 60 seconds of exposure.

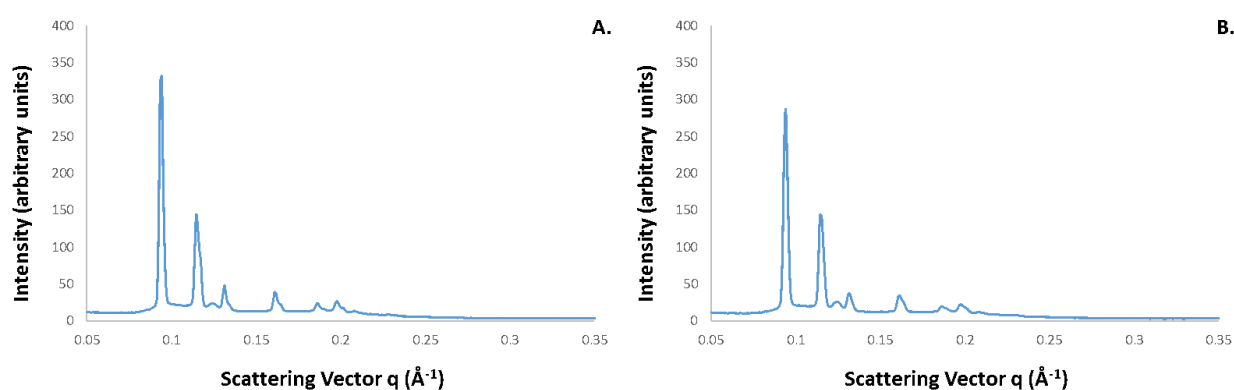

Fig. S9 Unloaded glyceryl monooleate sample (S9A) prior to NIR exposure and (S9B) after 60 seconds of exposure.

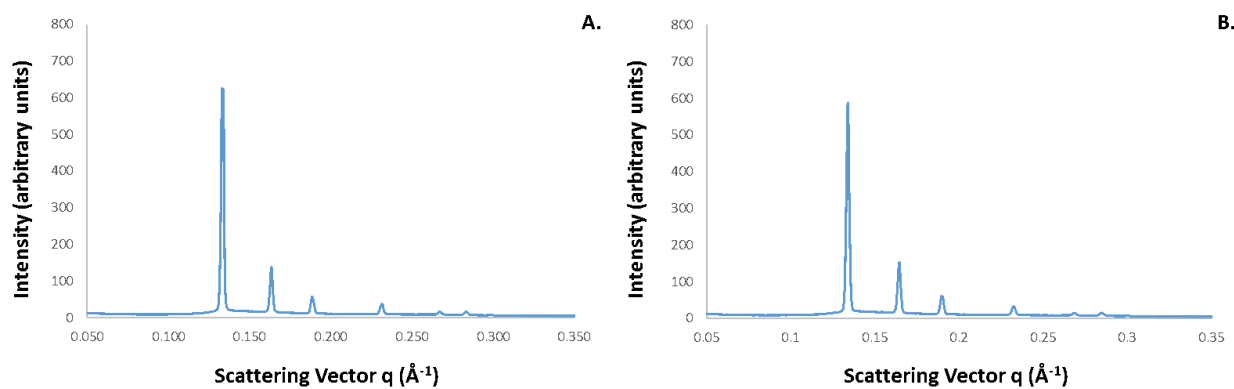

Fig. S10 Unloaded phytantriol sample (S10A) prior to NIR exposure and (S10B) after 60 seconds of exposure.

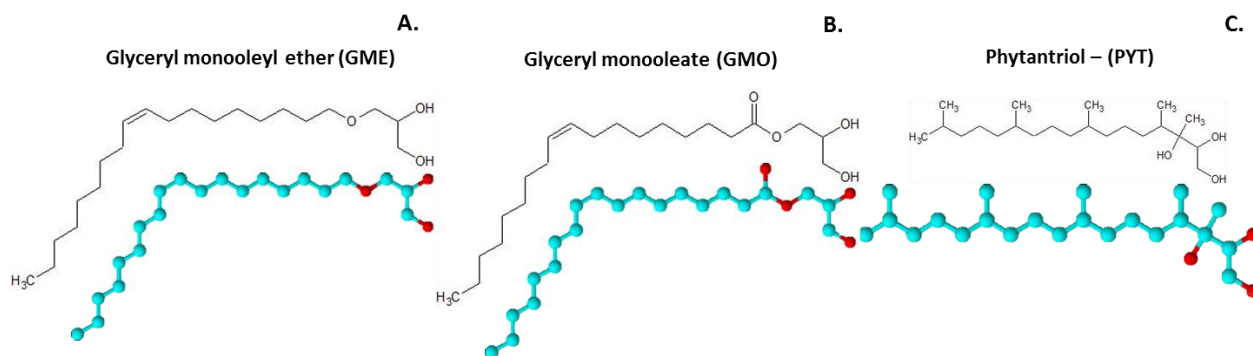

**Fig. S11** Chemical structure of (S11A.) glyceryl monoether, (S11B.) glyceryl monooleate and (S11C.) phytantriol with carbons blue and oxygens red. Drawn using ACD/ChemSketch (Freeware), version 14.1, Advanced Chemistry Development, Inc., Toronto, ON, Canada, [www.acdlabs.com](http://www.acdlabs.com), 2015.

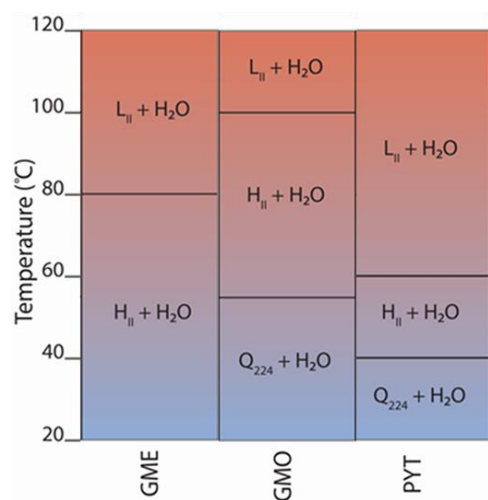

Fig. S12 Phase diagram at 50 %w/w for each of the three lipid systems explored within this study.
